# Supplementary material
Source: PubMed Central journal article supplement (PMC2949104)

# Supplemental Figure I

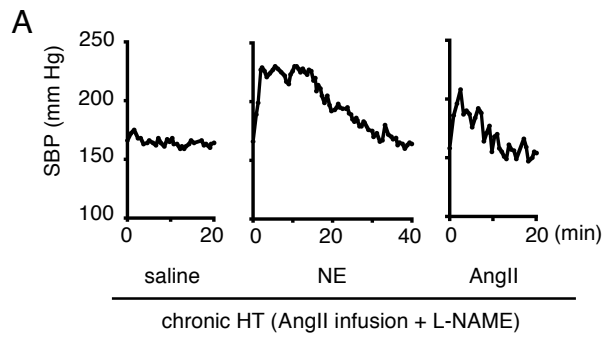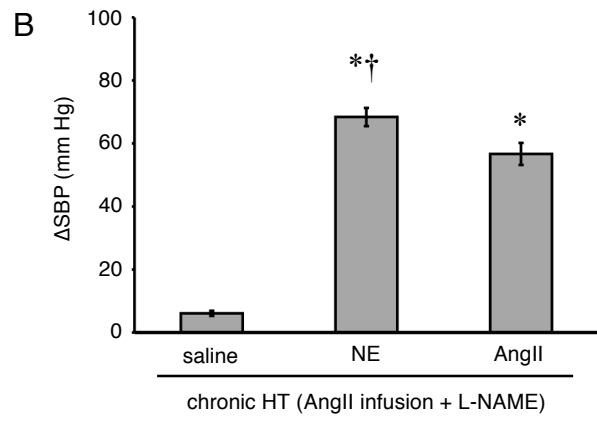

Supplemental Figure II

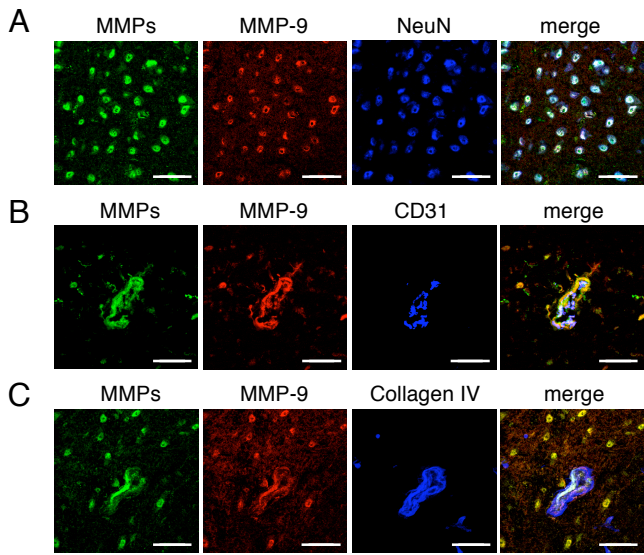

Supplement: jcbfm2009183x1.pdf [file jcbfm2009183x1.pdf]
